# Supplementary material
Source: Springer Nature journal article supplement (http://www.nature.com/nchembio/journal/v3/n7/extref/nchembio.2007.3-S2.pdf)

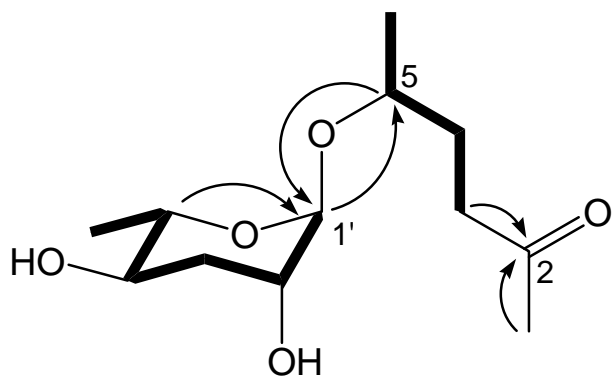

**Supplementary Figure 2** Key COSY interactions (bold) and HMBC interactions (arrows) for **1**.

Supplement: nchembio.2007.3-S2.pdf [file nchembio.2007.3-S2.pdf]
